# Supplementary material for: Treatment Patterns and Health Care Costs in Commercially Insured Patients with Follicular Lymphoma
Source: PubMed Central journal article supplement (PMC7539759; doi:10.36469/jheor.2020.16784), 2020-09-04
Supplement: jheor-7-2-16784-s01.pdf [file jheor-7-2-16784-s01.pdf]

### Supplementary Online Material

Fowler NH, Chen G, Lim S, Manson S, Ma Q, Li FY. Treatment patterns and health care costs in commercially insured patients with follicular lymphoma. *JHEOR*. 2020;7(2):148-157.  
doi:[10.36469/jheor.2020.16784](https://doi.org/10.36469/jheor.2020.16784)

#### **Table S1.** Recommended Treatment Regimens

This supplementary material has been provided by the authors to give readers additional information about their work.

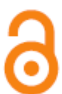

**Table S1. Recommended Treatment Regimens**

| <b>List of NCCN Recommended Agents for Patients with FL</b> | <b>Drug Class</b>                   | <b>First-Line Regimens</b>                                                                       |
|-------------------------------------------------------------|-------------------------------------|--------------------------------------------------------------------------------------------------|
| Duvelisib                                                   | Kinase inhibitor                    | <b>Fit Adults</b>                                                                                |
| Rituximab                                                   | Monoclonal antibody                 | Preferred regimens                                                                               |
| Obinutuzumab                                                | Cytolytic antibody                  | <ul style="list-style-type: none"> <li>• Bendamustine and (obinutuzumab or rituximab)</li> </ul> |
| Bendamustine                                                | Chemotherapy                        | <ul style="list-style-type: none"> <li>• CHOP and (obinutuzumab or rituximab)</li> </ul>         |
| Cyclophosphamide                                            | Chemotherapy                        | <ul style="list-style-type: none"> <li>• CVP and (obinutuzumab or rituximab)</li> </ul>          |
| Doxorubicin                                                 | Chemotherapy                        | <ul style="list-style-type: none"> <li>• Lenalidomide and rituximab</li> </ul>                   |
| Vincristine                                                 | Chemotherapy                        | Other regimens                                                                                   |
| Prednisone                                                  | Corticosteroid                      | <ul style="list-style-type: none"> <li>• Rituximab</li> </ul>                                    |
| Lenalidomide                                                | Immunomodulator                     | <b>Frail Adults</b>                                                                              |
| Fludarabine                                                 | Chemotherapy                        | Preferred regimens                                                                               |
| Mitoxantrone                                                | Chemotherapy (antitumor antibiotic) | <ul style="list-style-type: none"> <li>• Rituximab</li> </ul>                                    |
| Ofatumumab                                                  | Antibody                            | Other regimens                                                                                   |
| Ibritumomab tiuxetan                                        | Radioimmunotherapy                  | <ul style="list-style-type: none"> <li>• Chlorambucil and rituximab</li> </ul>                   |
| Chlorambucil                                                | Chemotherapy                        | <ul style="list-style-type: none"> <li>• Chlorambucil</li> </ul>                                 |
| Idelalisib                                                  | Kinase inhibitor                    | <ul style="list-style-type: none"> <li>• Cyclophosphamide</li> </ul>                             |
| Copanlisib                                                  | Kinase inhibitor                    | <ul style="list-style-type: none"> <li>• Ibritumomab tiuxetan</li> </ul>                         |

Abbreviations: NCCN, National Comprehensive Cancer Network.
